# Supplementary material for: Vision in avian emberizid foragers: maximizing both binocular vision and fronto-lateral visual acuity
Source: Oxford University Press journal article supplement (doi:10.1242/jeb.108613), 2015-01-01
Supplement: jeb108613supp.pdf [file jeb108613supp.pdf]

**Fig. S1.** Schematic top- and side-view representations of the approximate angular projections of the foveae into the visual field (dashed-dotted lines; see assumptions in Methods) for (a) American tree sparrows, (b) chipping sparrows, (c) dark-eyed juncos, (d) Eastern towhees, (e) field sparrows, (f) song sparrows, and (g) white-throated sparrows. The triangle represents the beak, the vertical dashed line represents the axis passing through the center of the beak, and the horizontal dashed line represents the axis passing through the posterior nodal point of both eyes.

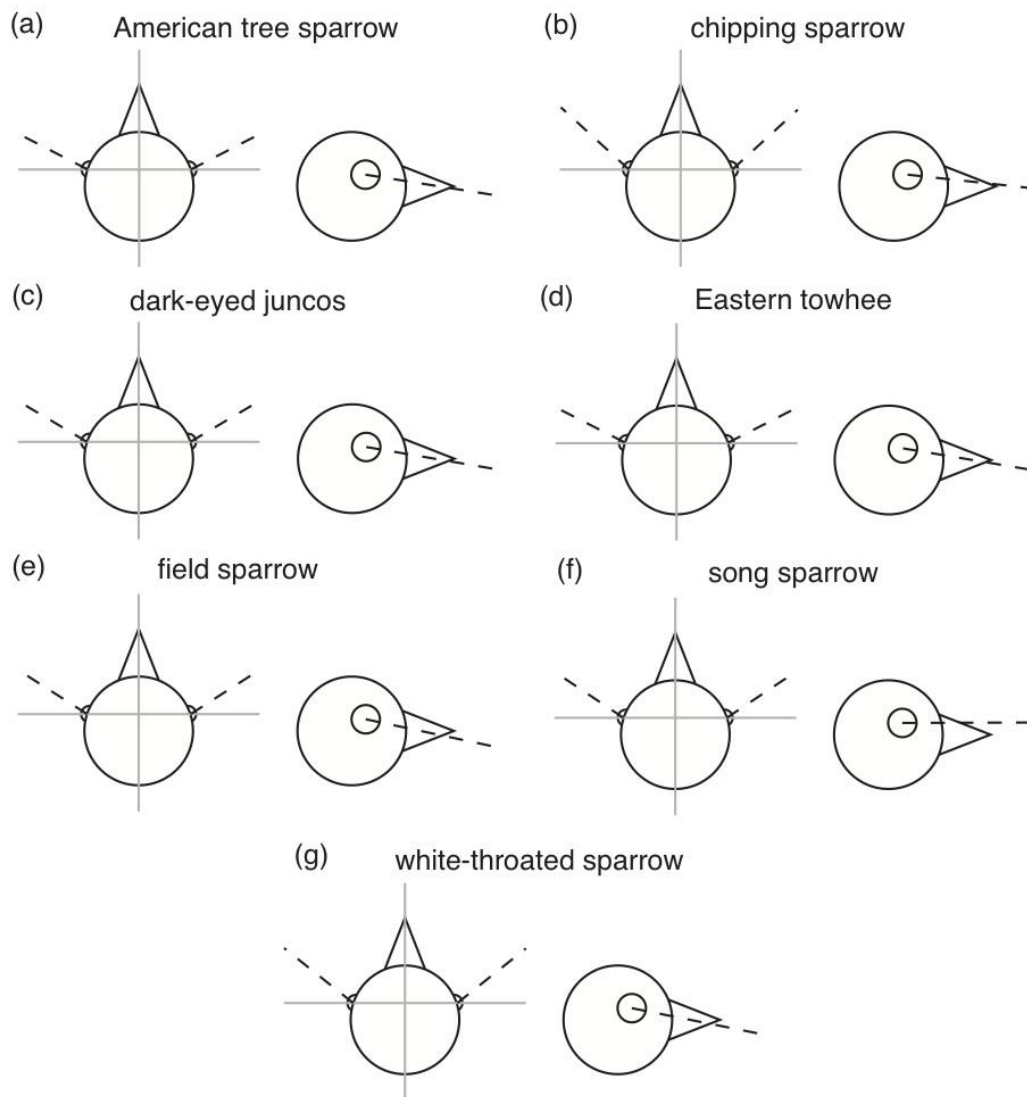

**Fig. S2.** Configuration of the visual field in the horizontal plane ( $90^\circ - 270^\circ$ ) while the eyes are at rest in the (a) American tree sparrow, (b) chipping sparrow, (c) dark-eyed junco, (d) Eastern towhee, (e) field sparrow, (f) song sparrow, and (g) white-throated sparrow. Shown are the size of the binocular field, lateral field, and blind area, along with the projection of the bill. Values are averaged across all individuals measured per species.

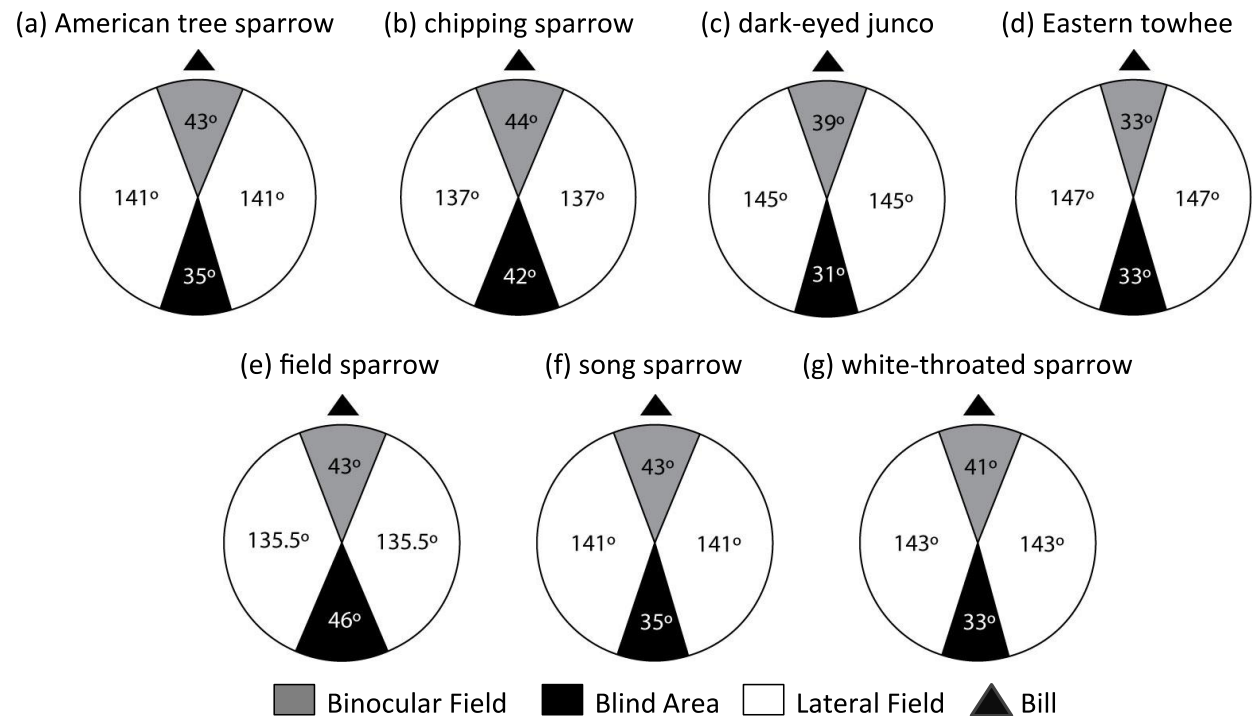

**Fig. S3.** Median-sagittal angular separation of the retinal field margins per 10° of elevation around the head of (a) American tree sparrows, (b) chipping sparrows, (c) dark-eyed juncos, (d) Eastern towhees, (e) field sparrows, (f) song sparrows, and (g) white-throated sparrows. Positive values represent binocular field overlap, whereas negative values represent blind areas. Values are averaged across all individuals measured per species. The front of the head is at 90°, back of the head is at 270°, and above the head is at 0° (above the head). Arrows indicate projection of the bill-tip in relation to the ground (all horizontally placed at 90°).

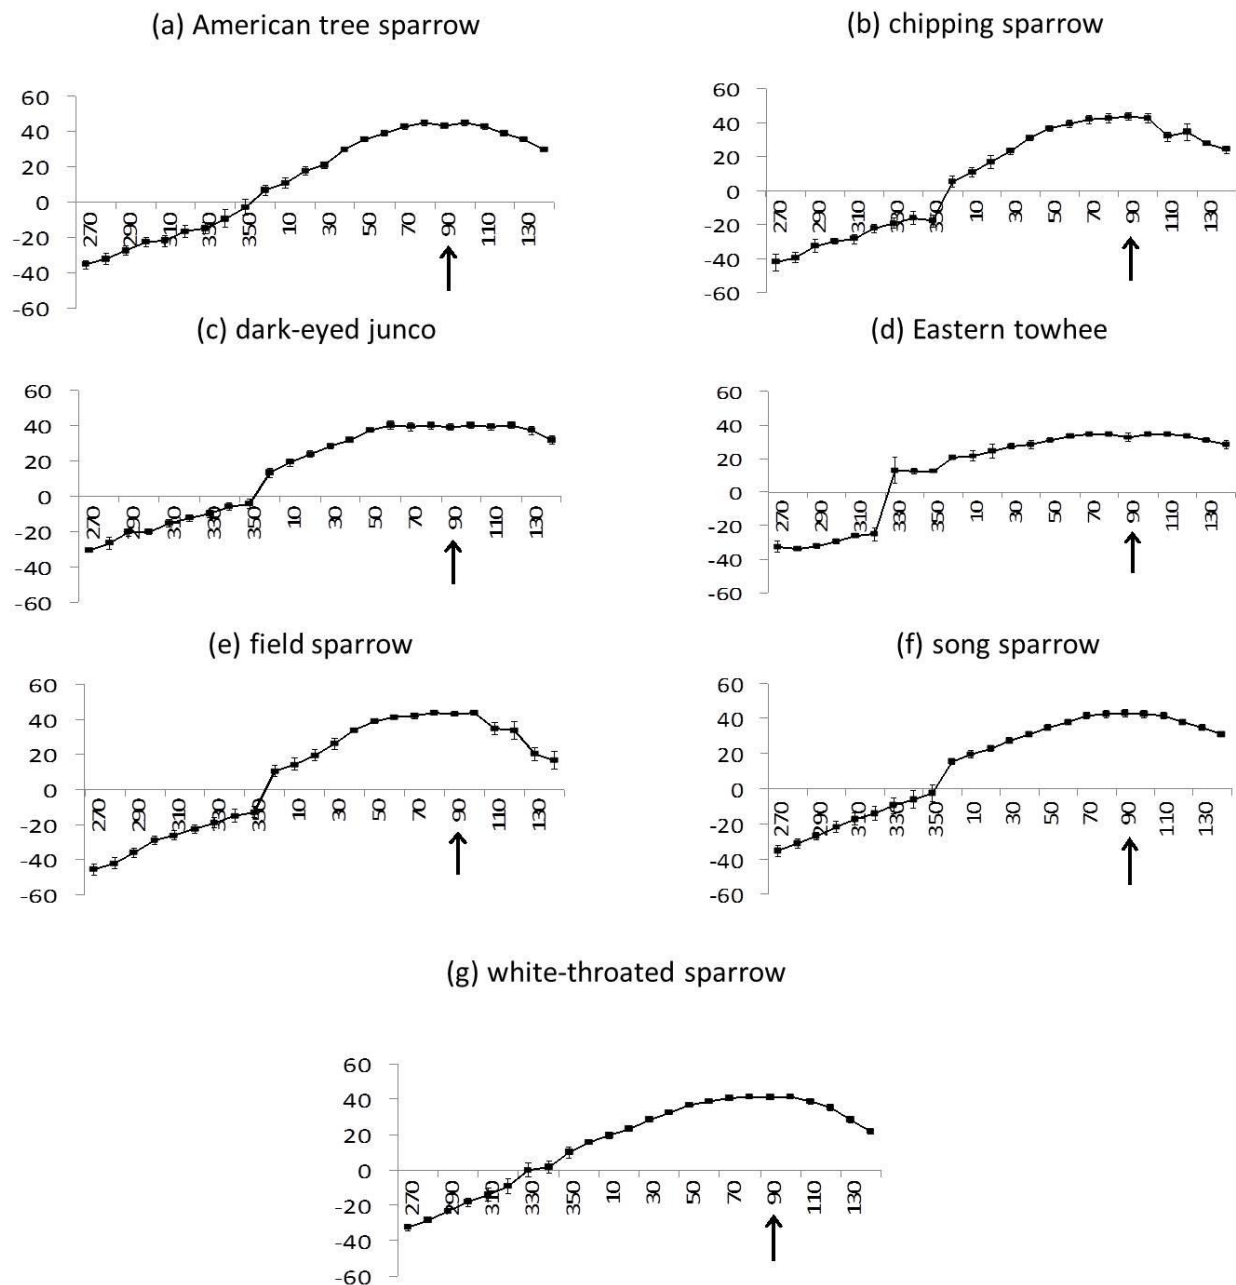

**Fig. S4.** Degree of eye movements in the direction of each elevation of (a) American tree sparrows, (b) chipping sparrows, (c) dark-eyed juncos, (d) Eastern towhees, (e) field sparrows, (f) song sparrows, and (g) white-throated sparrows. Eye movements are shown in the medial sagittal plan from the left side of the bird's head. Values are averaged across all individuals measured per species. Some values are not shown for the American tree sparrow because we were not successful at measuring eye movements above its head.

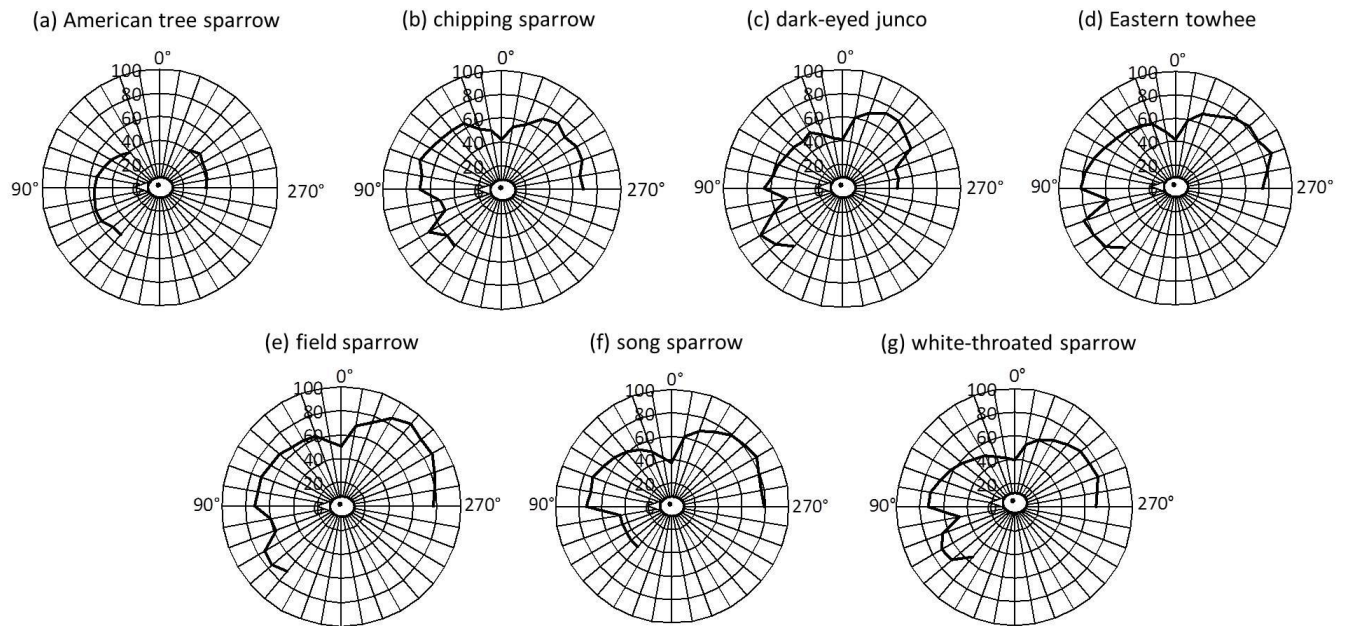

**Fig. S5.** The configuration of the visual field in the horizontal plane ( $90^\circ$  -  $270^\circ$ ) while the eyes are converged maximally forward (e.g., rotated forward) in (a) American tree sparrows, (b) chipping sparrows, (c) dark-eyed juncos, (d) Eastern towhees, (e) field sparrows, (f) song sparrows, and (g) white-throated sparrows. Shown are the size of the binocular field, lateral field, and blind area, along with the projection of the bill. Values are averaged across all individuals measured per species.

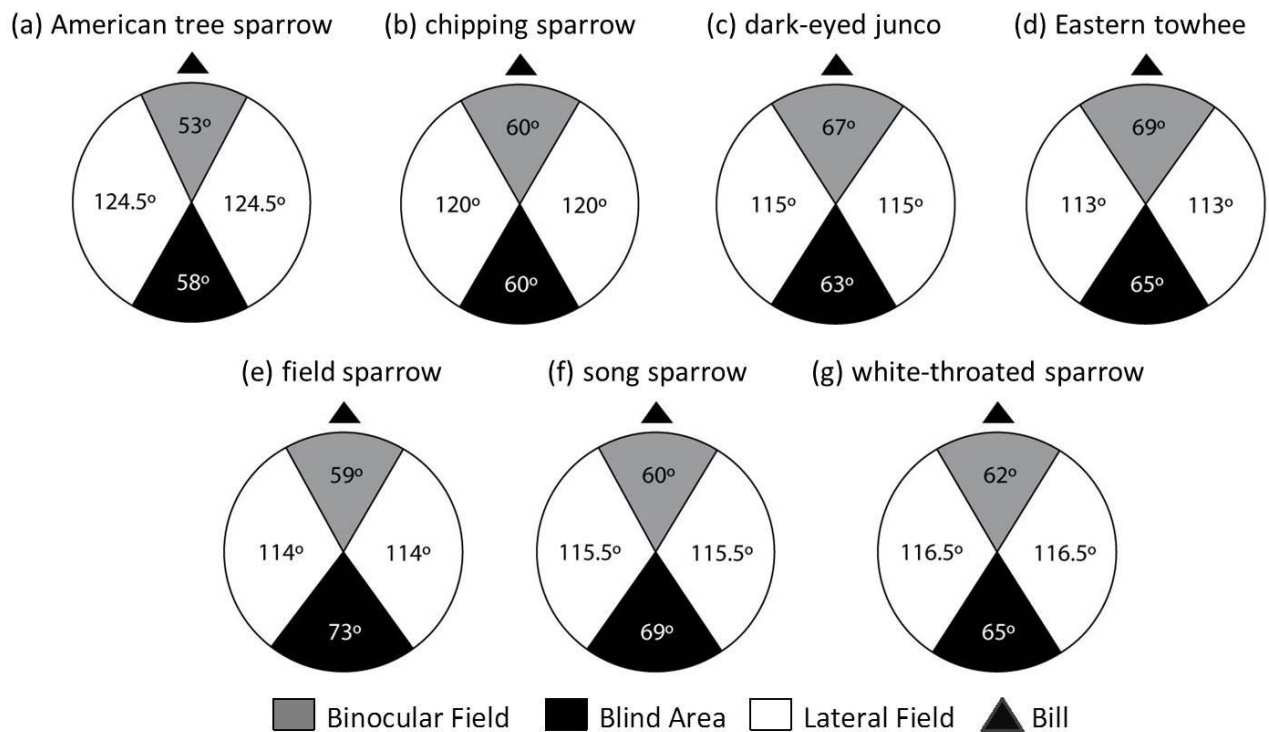

**Fig. S6.** Orthographic projection of the boundaries of the retinal fields of the two eyes around the head while the eyes are converged maximally forward for (a) American tree sparrows, (b) chipping sparrows, (c) dark-eyed juncos, (d) Eastern towhees, (e) field sparrows, (f) song sparrows, and (g) white-throated sparrows. Values are averaged across all individuals measured per species. The eyes are converged in the direction of the elevation being measured, so the figures do not represent the visual field at any particular given moment but rather the value of maximal convergence in the direction of each elevation. A latitude and longitude coordinate system was used with the head of the animal at the center of the globe. The grid is set at 20° intervals, the equator aligned vertically in the median sagittal plane (the horizontal plane, 90° - 270°). The projection of the bill tips are presented for orientation purposes. The dotted lines represent the extrapolated binocular field assuming that the retinal margin follows a circular projection, suggesting that the individuals could see their bill tips. Some values are not shown for the American tree sparrow because we were not successful at measuring eye movements above its head.

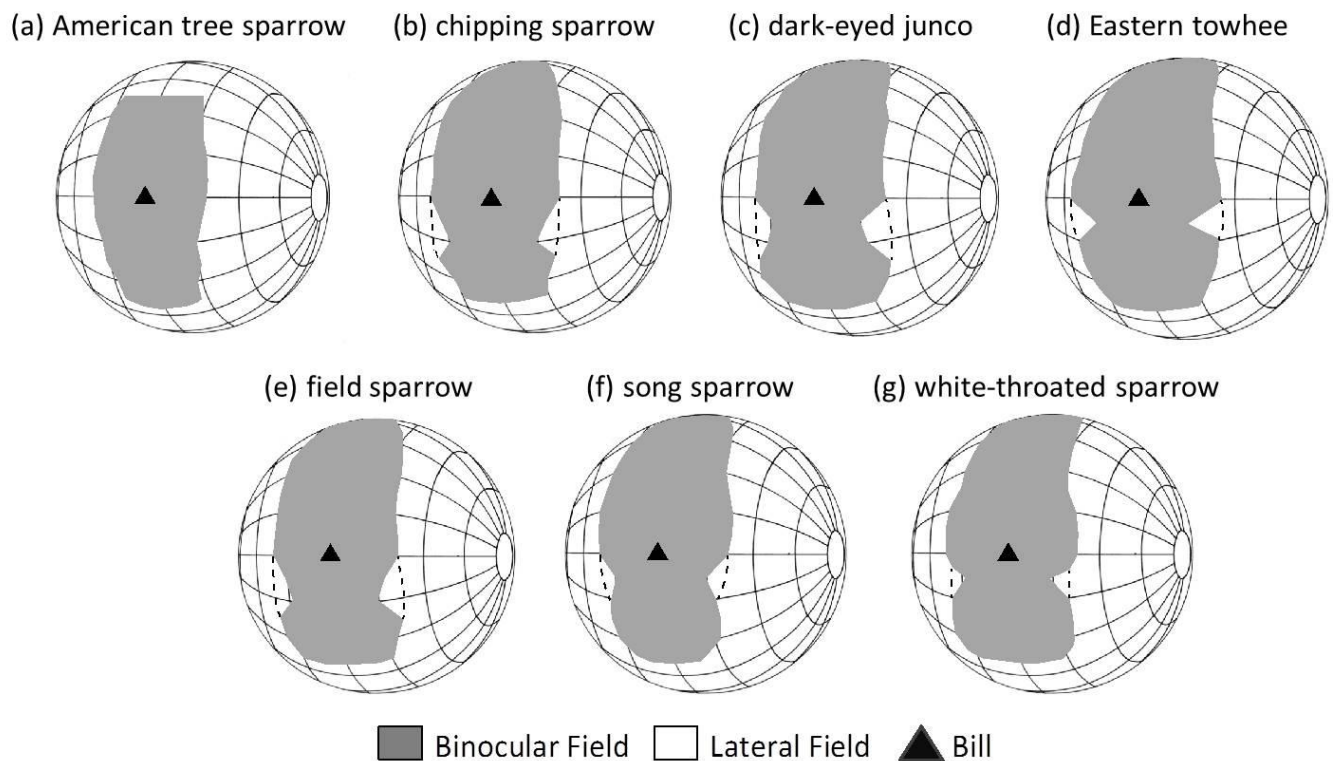

**Fig. S7. Phylogenetic Tree of all nine Emberizid species studied. The tree was modified from Carson and Spicer (2003)**

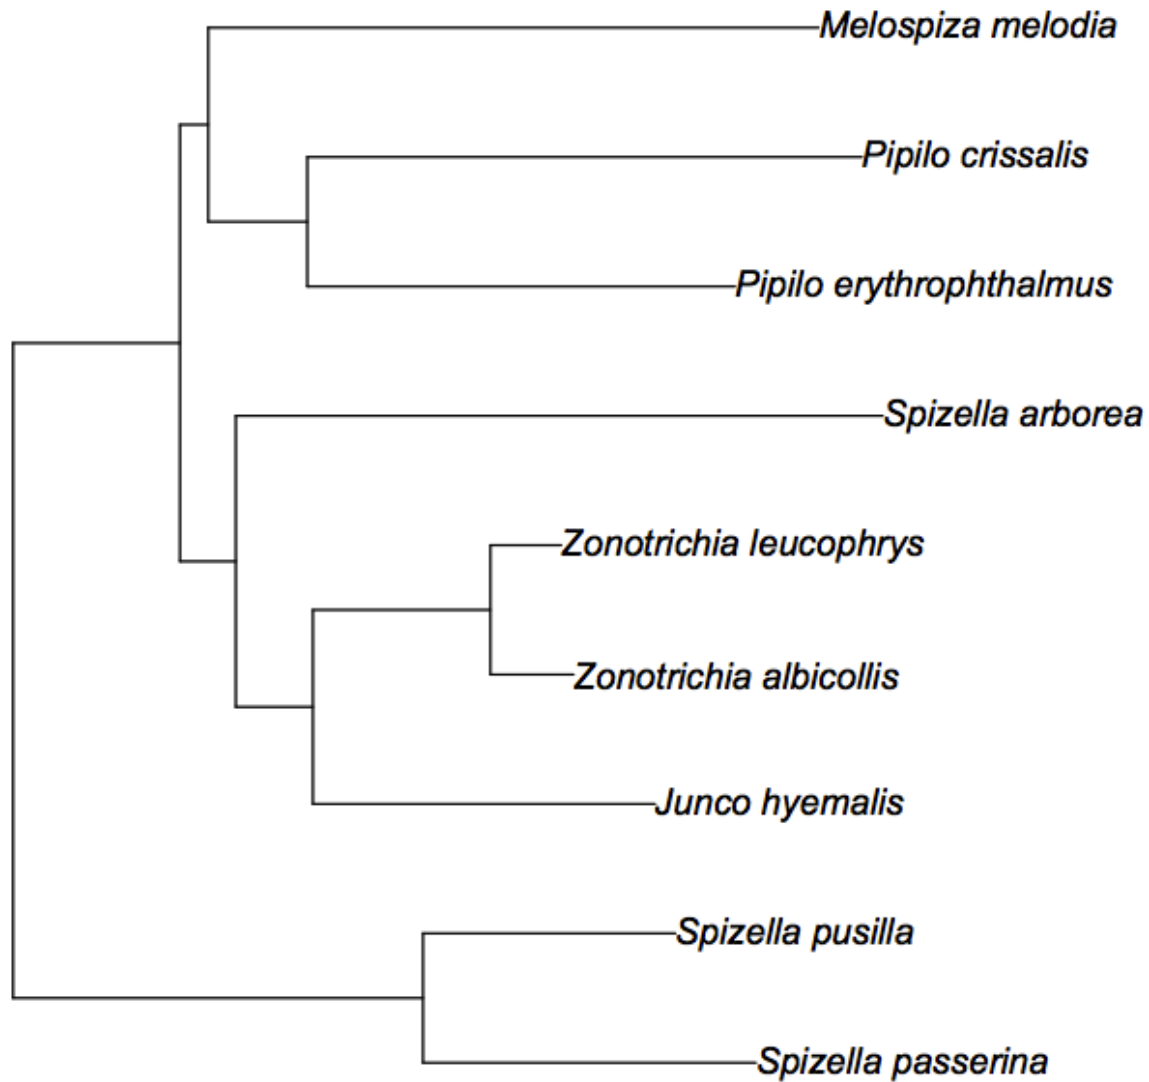



**Table S1. Habitat use, foraging methods, main food types and usual predators of the nine emberizid sparrows used in this study**

| Species                | Habitat                                     | Foraging methods                                                                 | Food Type                                            | Predators                               | Reference              |
|------------------------|---------------------------------------------|----------------------------------------------------------------------------------|------------------------------------------------------|-----------------------------------------|------------------------|
| American Tree Sparrow  | Forest edge, open scrubby grasslands        | Scratching, hopping, gleaning, darting, pecking                                  | Seeds, berries, insects                              | Hawks, owls                             | Naugler 1993           |
| California Towhee      | Forest edge, scrubby, dense vegetation      | Pecking, scratching, gleaning                                                    | Seeds more than other vegetable matter, some insects | Hawks, owls, ground predators           | Benedict et al. 2011   |
| Chipping Sparrow       | Open grassy, forest edges, human landscapes | Scratching, pecking, hopping, running, occasionally by wing                      | Seeds, grasses, some insects, invertebrates          | Hawks, owls, mammalian ground predators | Middleton 1998         |
| Dark-eyed Junco        | Forest edge, harvested fields, parks        | Gleaning, pecking, scratching, hopping                                           | Seeds and arthropods                                 | Hawks, owls, jays, ground predators     | Nolan et al. 2002      |
| Eastern Towhee         | Forest edge, dense shrubs                   | Double scratching, pecking, running, hovering, gleaning, hawking, aerial pursuit | Seeds, fruits, many invertebrates                    | Hawks                                   | Greenlaw 1996          |
| Field Sparrow          | Fields, woodland openings, forest edges     | Pecking, perching, pouncing                                                      | Primarily grass seeds, some insects                  | Hawks                                   | Carey et al. 2008      |
| Song Sparrow           | Forest edge, scrubby fields                 | Double scratching, hawking, aerial capture, pecking                              | Seeds, fruits, invertebrates                         | Hawks, owls, mammalian ground predators | Arcese et al. 2002     |
| White-crowned sparrow  | Forest edge to tundra, grassy               | Hawks from perch, scratching, pecking                                            | Seeds, fruits, plants, insects                       | Hawks, owls, ground predators           | Chilton et al. 1995    |
| White-throated sparrow | Edge, forests, dense shrubs                 | Double scratching, pouncing, gleaning, aerial capture, pecking                   | Seeds, fruits, many insects                          | Hawks, owls, mammalian ground predators | Falls & Kopachena 2010 |



- Arcese, P., Sogge, M.K., Marr, A.B., and Patten, M.A.** (2002). Song Sparrow (*Melospiza melodia*), The Birds of North America Online (A. Poole, Ed.). Ithaca: Cornell Lab of Ornithology; Retrieved from the Birds of North America Online: <http://bna.birds.cornell.edu/bna/species/704> doi:10.2173/bna.704
- Benedict, L., Kunzmann, M. R., Ellison, K., Purcell, K.L., Johnson, R.R., and Haight, L.T.** (2011). California Towhee (*Melospiza crissalis*), The Birds of North America Online (A. Poole, Ed.). Ithaca: Cornell Lab of Ornithology; Retrieved from the Birds of North America Online: <http://bna.birds.cornell.edu/bna/species/632> doi:10.2173/bna.632
- Carey, M., Carey, M., Burhans, D.E., and Nelson, D.A.** (2008). Field Sparrow (*Spizella pusilla*), The Birds of North America Online (A. Poole, Ed.). Ithaca: Cornell Lab of Ornithology; Retrieved from the Birds of North America Online: <http://bna.birds.cornell.edu/bna/species/103> doi:10.2173/bna.103
- Chilton, G., Baker, M.C., Barrentine, C.D., and Cunningham, M.A.** (1995). White-crowned Sparrow (*Zonotrichia leucophrys*), The Birds of North America Online (A. Poole, Ed.). Ithaca: Cornell Lab of Ornithology; Retrieved from the Birds of North America Online: <http://bna.birds.cornell.edu/bna/species/183> doi:10.2173/bna.183
- Falls, J. B. and Kopachena, J.G.** (2010). White-throated Sparrow (*Zonotrichia albicollis*), The Birds of North America Online (A. Poole, Ed.). Ithaca: Cornell Lab of Ornithology; Retrieved from the Birds of North America Online: <http://bna.birds.cornell.edu/bna/species/128> doi:10.2173/bna.128
- Greenlaw, J.S.** (1996). Eastern Towhee (*Pipilo erythrophthalmus*), The Birds of North America Online (A. Poole, Ed.). Ithaca: Cornell Lab of Ornithology; Retrieved from the Birds of North America Online: <http://bna.birds.cornell.edu/bna/species/262> doi:10.2173/bna.262
- Middleton, A.L.** (1998). Chipping Sparrow (*Spizella passerina*), The Birds of North America Online (A. Poole, Ed.). Ithaca: Cornell Lab of Ornithology; Retrieved from the Birds of North America Online: <http://bna.birds.cornell.edu/bna/species/334> doi:10.2173/bna.334
- Naugler, C.T.** (1993). American Tree Sparrow (*Spizella arborea*), The Birds of North America Online (A. Poole, Ed.). Ithaca: Cornell Lab of Ornithology; Retrieved from the Birds of North America Online: <http://bna.birds.cornell.edu/bna/species/037> doi:10.2173/bna.37
- Nolan, Jr., V., Ketterson, E.D., Cristol, D.A., Rogers, C.M., Clotfelter, E.D., Titus, R.C., Schoech, S.J., and Snajdr, E.** (2002). Dark-eyed Junco (*Junco hyemalis*), The Birds of North America Online (A. Poole, Ed.). Ithaca: Cornell Lab of Ornithology; Retrieved from the Birds of North America Online: <http://bna.birds.cornell.edu/bna/species/716> doi:10.2173/bna.716

**Table S2. Bill size measurements (length, width, depth, in mm) of nine emberizid sparrows**

|                           | length<br>mean | length SE | width mean | width SE | depth mean | depth SE |
|---------------------------|----------------|-----------|------------|----------|------------|----------|
| American tree<br>sparrow  | 8.75           | 0.14      | 4.77       | 0.09     | 5.83       | 0.11     |
| California towhee         | 12.04          | 0.14      | 6.17       | 0.10     | 7.70       | 0.12     |
| chipping sparrow          | 7.81           | 0.11      | 4.03       | 0.07     | 4.81       | 0.09     |
| dark-eyed junco           | 9.35           | 0.10      | 4.55       | 0.07     | 5.66       | 0.08     |
| Eastern towhee            | 11.42          | 0.09      | 5.44       | 0.06     | 7.59       | 0.07     |
| field sparrow             | 7.58           | 0.14      | 4.00       | 0.10     | 5.04       | 0.12     |
| song sparrow              | 10.72          | 0.18      | 5.28       | 0.12     | 6.52       | 0.15     |
| white-crowned<br>sparrow  | 9.63           | 0.13      | 4.96       | 0.09     | 6.28       | 0.11     |
| white-throated<br>sparrow | 10.22          | 0.18      | 4.85       | 0.12     | 6.52       | 0.15     |

**Table S3.** Average number of grid sites deployed and eventually counted per retina, average asf (the ratio of the area of the counting frame to the area of the grid), average  $\sum Q$  (sum of the total number of retinal ganglion cells counted), and average estimated total number of ganglion cells in the retina.

| Species                   | # grid sites<br>laid out | # grid sites<br>counted | asf                  | $\sum Q$              | Total RGCs                |
|---------------------------|--------------------------|-------------------------|----------------------|-----------------------|---------------------------|
| American tree<br>sparrow  | 409.60 ±<br>2.84         | 378 ± 6                 | 0.01247 ±<br>0.00379 | 22854.47 ±<br>1179.79 | 1841750.57 ±<br>120425.95 |
| Chipping sparrow          | 410.75 ±<br>2.87         | 379 ± 9                 | 0.01576 ±<br>0.00054 | 22292.99 ±<br>1615.64 | 1409253.08 ±<br>54827.08  |
| Dark-eyed junco           | 406.80 ±<br>3.71         | 357 ± 11                | 0.01216 ±<br>0.00024 | 16492.90 ±<br>1292.92 | 1359735.79 ±<br>112505.59 |
| Eastern towhee            | 413.00 ±<br>0.00         | 398 ± 7                 | 0.00673 ±<br>0.00026 | 18353.67 ±<br>106.00  | 2732432.00 ±<br>90908.16  |
| Field sparrow             | 407.20 ±<br>4.24         | 390 ± 6                 | 0.01491 ±<br>0.00065 | 20284.00 ±<br>1092.44 | 1362862.54 ±<br>57873.74  |
| Song sparrow              | 406.80 ±<br>1.24         | 377 ± 7                 | 0.01082 ±<br>0.00038 | 17758.40 ±<br>809.07  | 1645727.81 ±<br>78272.79  |
| White-throated<br>sparrow | 409.00 ±<br>3.34         | 376 ± 9                 | 0.01133 ±<br>0.00052 | 19188.50 ±<br>697.35  | 1705752.48 ±<br>109274.70 |
